# Supplementary material for: Abrupt excursion in water vapor isotopic variability during cold fronts at the Pointe Benedicte observatory in Amsterdam Island
Source: Copernicus journal article supplement (doi:10.5194/egusphere-2023-1617), 2023-08-22
Supplement: Supplementary file 1 [file egusphere-2023-1617-supplement.pdf]

1 **Supplementary material to**

2

3 **Abrupt excursion in water vapor isotopic variability during cold fronts at**  
4 **the Pointe Benedicte observatory in Amsterdam Island**

5

6

7 Amaëlle Landais<sup>1,\*</sup>, Cécile Agosta<sup>1,\*</sup>, Françoise Vimeux<sup>1,2</sup>, Olivier Magand<sup>3</sup>, Cyrielle Solis<sup>1</sup>,

8 Alexandre Cauquoin<sup>4</sup>, Niels Dutrievoz<sup>1</sup>, Camille Risi<sup>5</sup>, Christophe Leroy-Dos Santos<sup>1</sup>, Elise

9 Fourré<sup>1</sup>, Olivier Cattani<sup>1</sup>, Olivier Jossoud<sup>1</sup>, Bénédicte Minster<sup>1</sup>, Frédéric Prié<sup>1</sup>, Mathieu

10 Casado<sup>1</sup>, Aurélien Dommergue<sup>6</sup>, Yann Bertrand<sup>6</sup>, Martin Werner<sup>7</sup>

11

12 <sup>1</sup> Laboratoire des Sciences du Climat et de l'Environnement, LSCE/IPSL, CEA-CNRS-UVSQ,  
13 Université Paris-Saclay, 91191 Gif-sur-Yvette, France

14

15 <sup>2</sup> HydroSciences Montpellier (HSM), UMR 5569 (UM, CNRS, IRD), 34095 Montpellier, France

16

17 <sup>3</sup> Observatoire des Sciences de l'Univers à La Réunion (OSU-R), UAR 3365, CNRS, Université de La  
18 Réunion, Météo France, 97744 Saint-Denis, La Réunion, France

19

20 <sup>4</sup> Institute of Industrial Science (IIS), The University of Tokyo, Kashiwa, Japan.

21

22 <sup>5</sup> Laboratoire de Météorologie Dynamique, Institut Pierre - Simon Laplace, Sorbonne Université /  
23 CNRS / École Polytechnique – IPP, Paris, France

24

25 <sup>6</sup> Univ. Grenoble Alpes, CNRS, INRAE, IRD, Grenoble INP<sup>†</sup>, IGE, 38000 Grenoble, France  
26 (<sup>†</sup>Institute of Engineering and Management Univ. Grenoble Alpes)

27

28 <sup>7</sup> Alfred Wegener Institute, Helmholtz Centre for Marine and Polar Research, D-27570 Bremerhaven,  
29 Germany

30

31 \* corresponding authors who contributed equally to the study: [amaelle.landais@lsce.ipsl.fr](mailto:amaelle.landais@lsce.ipsl.fr) and  
32 [cecile.agosta@lsce.ipsl.fr](mailto:cecile.agosta@lsce.ipsl.fr)

33

34 1. Data model comparison over the two-year series

35 i

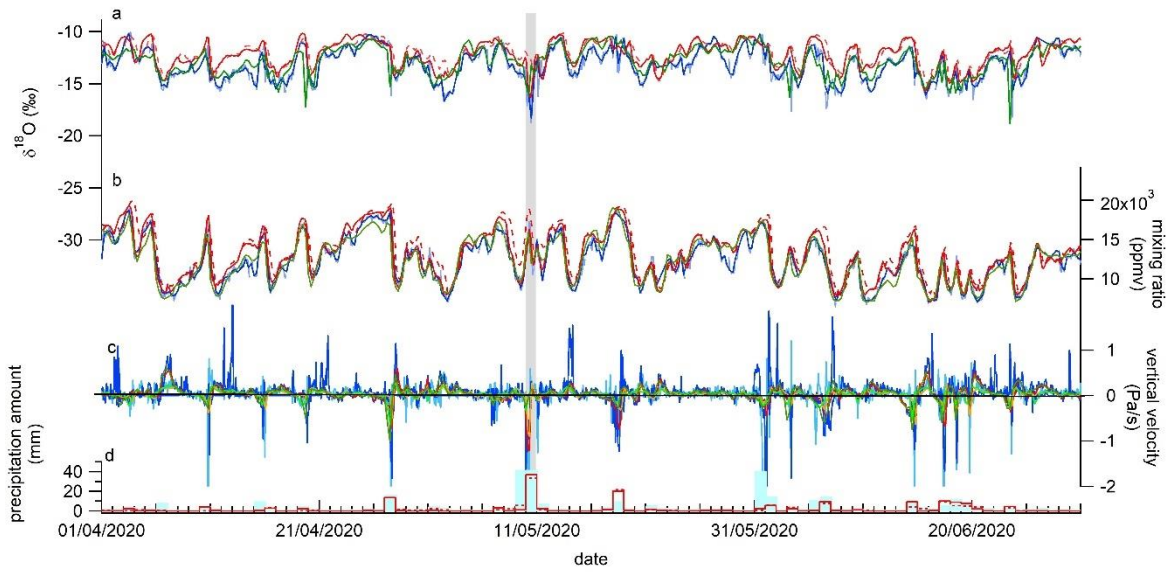

36

37 ii

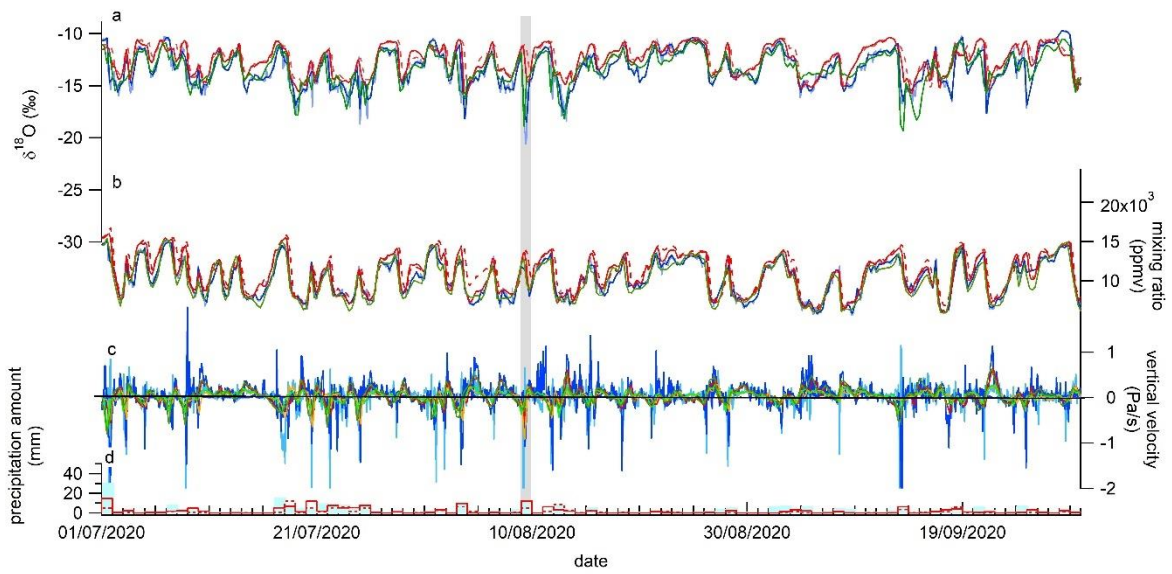

38

39 iii

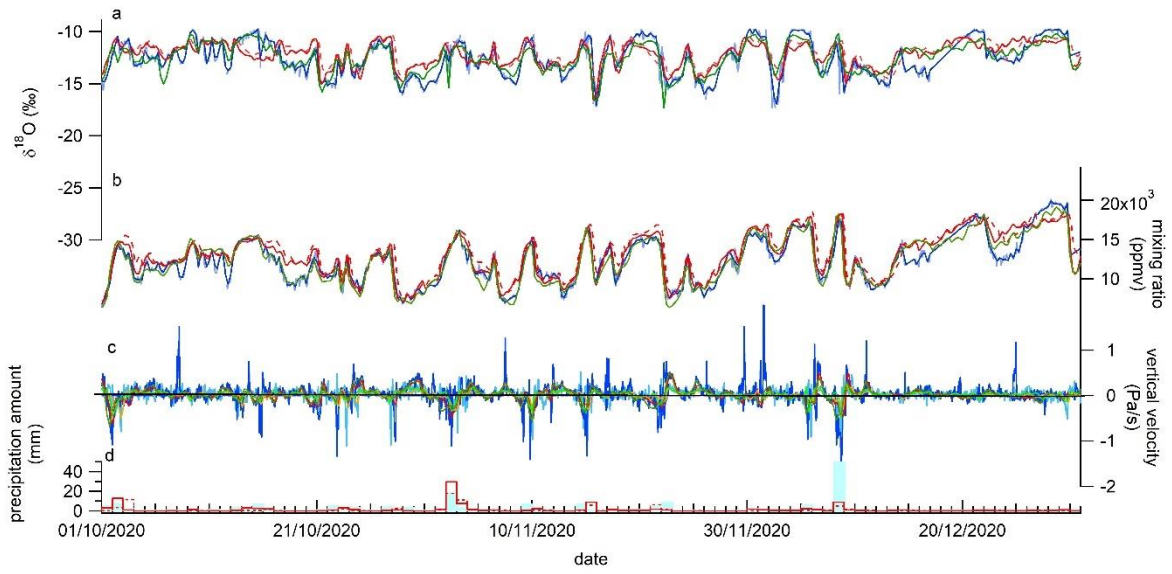

40

41 iv

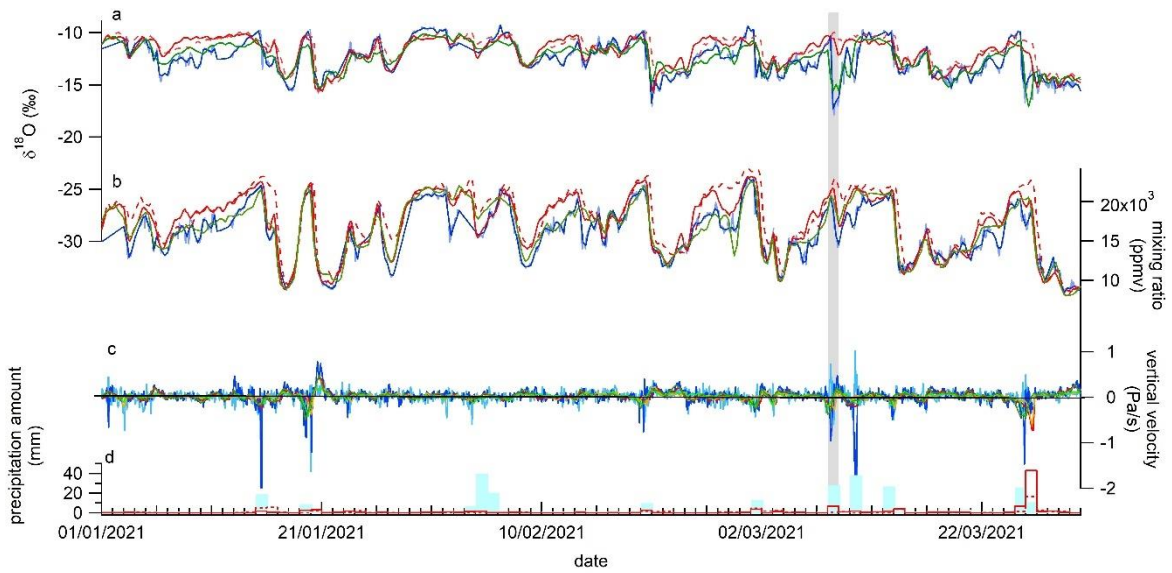

42

43

44

45

46

47

48

49

50

51

52

53 v

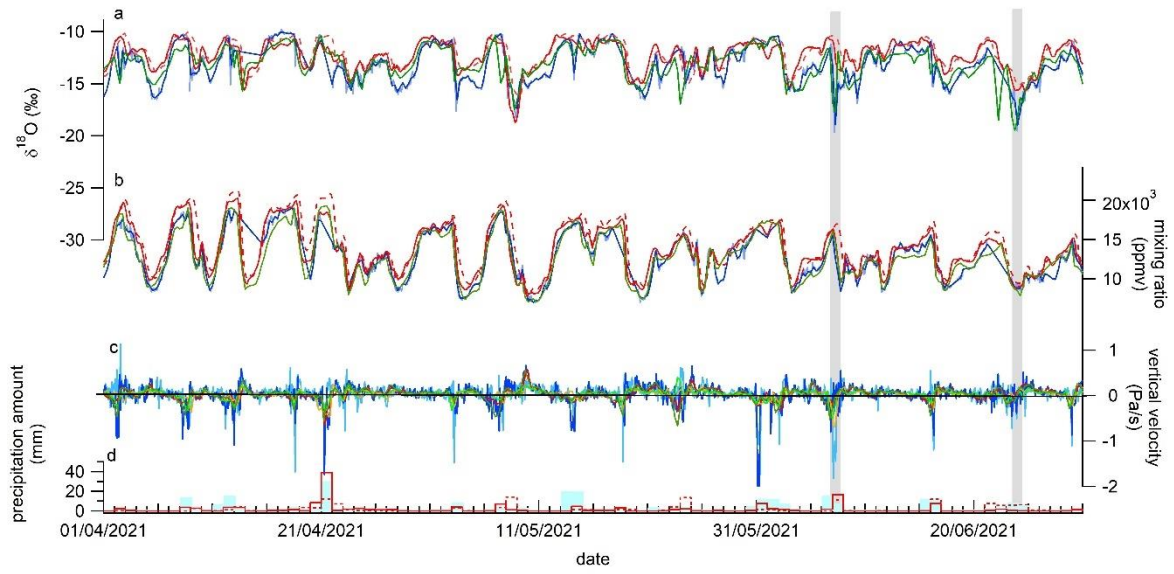

54

55 vi

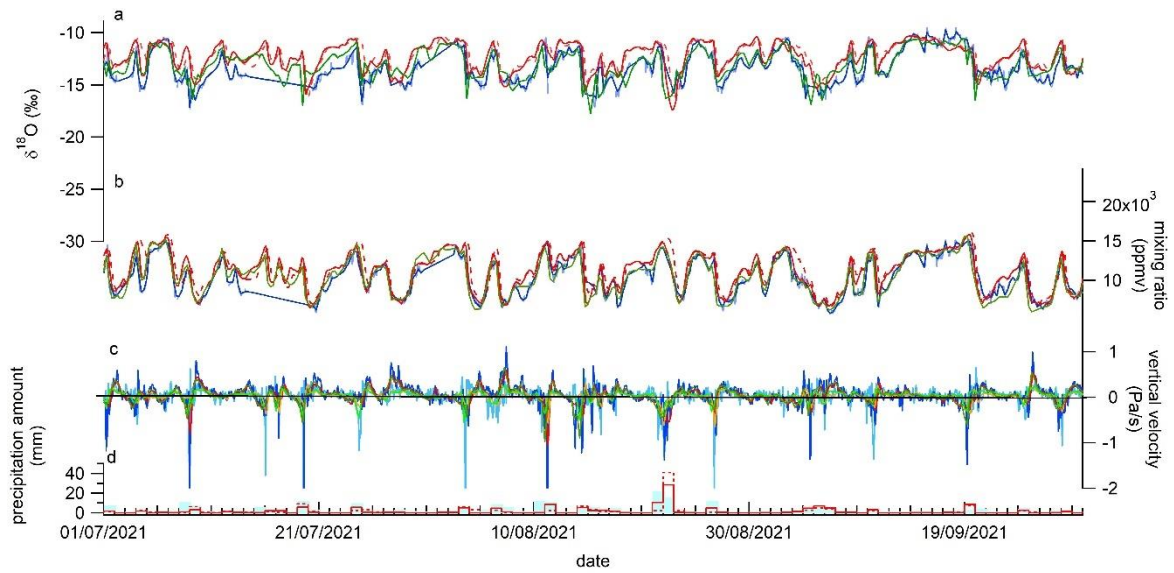

56

57

58

59

60

61

62

63

64

65

66

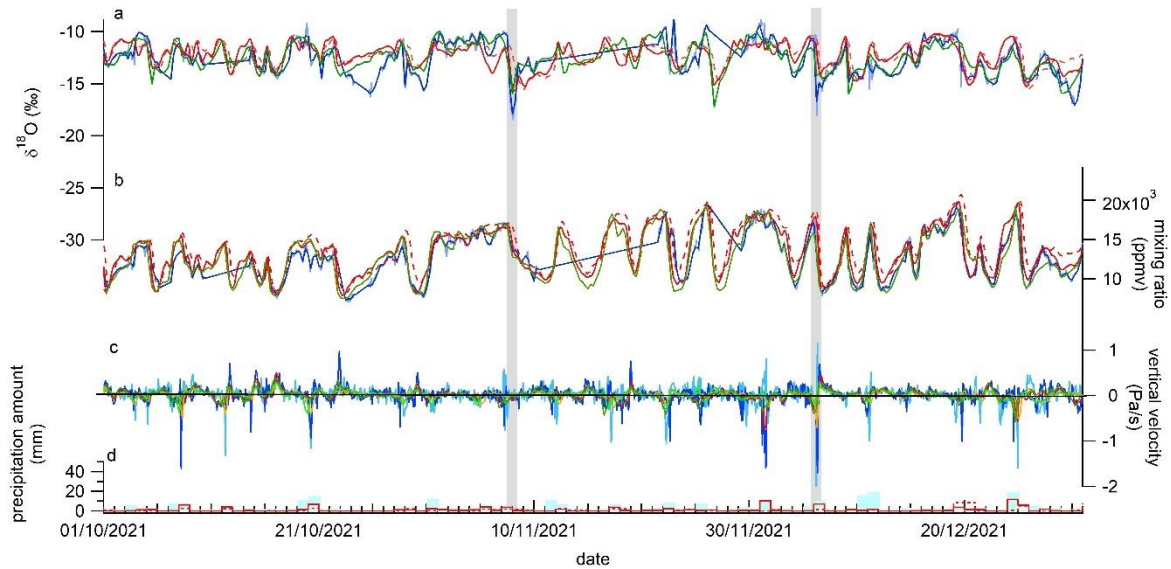

68

69 **Figure S1:** Data model comparison (April 2020 – December 2021) : water vapor  $\delta^{18}\text{O}$  from our  
70 data set (light blue on hourly average, dark blue resampled at a 6-hour resolution), the  
71 ECHAM6-wiso model (green, surface level, 6h resolution) and the LMDZ-iso model (red,  
72 surface level, 3h resolution) at very low resolution (VLR, dashed line) and at low resolution  
73 (solid line) (a) ; mixing ratio from our data set (light blue on hourly average, dark blue  
74 resampled at a 6 hours resolution), the ECHAM6-wiso model (green, surface level, 6h  
75 resolution) and the LMDZ-iso model (red, surface level, 3h resolution, dashed line for VLR  
76 and solid line for LR) (b) ; vertical velocity from the ERA5 reanalyses (500 hPa, blue, 850 hPa,  
77 light blue), from the ECHAM6-wiso model (500 hPa, green, 850 hPa, light green), from the  
78 LMDZ-iso model at LR (500 hPa, red, 850 hPa, orange) (c) ; Precipitation amount from the  
79 meteorological record in light blue, from the ECHAM6-wiso model in green and from the  
80 LMDZ-iso model in red (dashed line VLR and solid line LR) (d). The grey rectangles highlight  
81 the negative  $\delta^{18}\text{O}$  excursions.

82

83

84

85

86



87 2- Backtrajectories obtained with the flexpart model

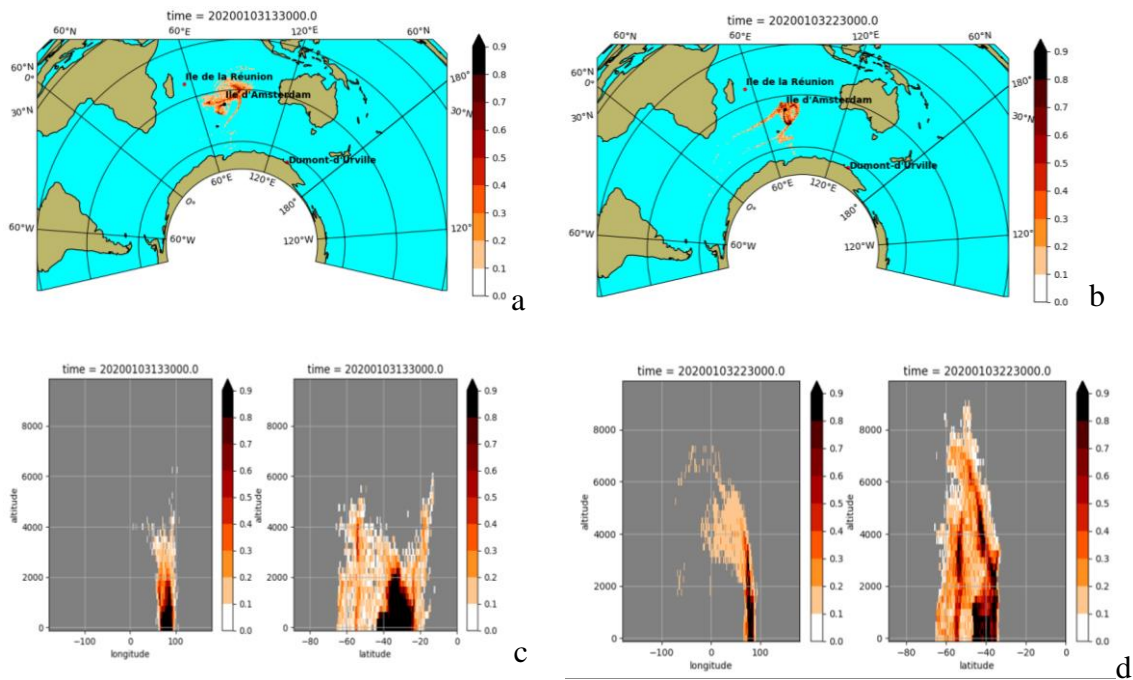

88  
89 **Figure S2:** FLEXPART footprints in 2D projections for the event of the 3<sup>rd</sup>-4<sup>th</sup> of January.  
90 The colors on each grid point of these projections represent the density of particles over the  
91 ten-day back trajectories (1000 particules per launch). A dark red color indicates a zone with a  
92 high concentration of particles, hence a region from which a large part of the air mass  
93 originates. a: latitude-longitude projection of the FLEXPART back trajectory footprint for the  
94 3<sup>rd</sup> of January 2020 at 13h30. b: same as a for the 3<sup>rd</sup> of January 2020 at 22h30. c: left is the  
95 longitude-altitude projection of the FLEXPART back trajectory footprint for the 3<sup>rd</sup> of  
96 January 2020 at 13h30; right is the latitude-altitude projection of the FLEXPART back  
97 trajectory footprint for the 3<sup>rd</sup> of January 2020 at 13h30. d: same as a for the 3<sup>rd</sup> of January  
98 2020 at 22h30.

99

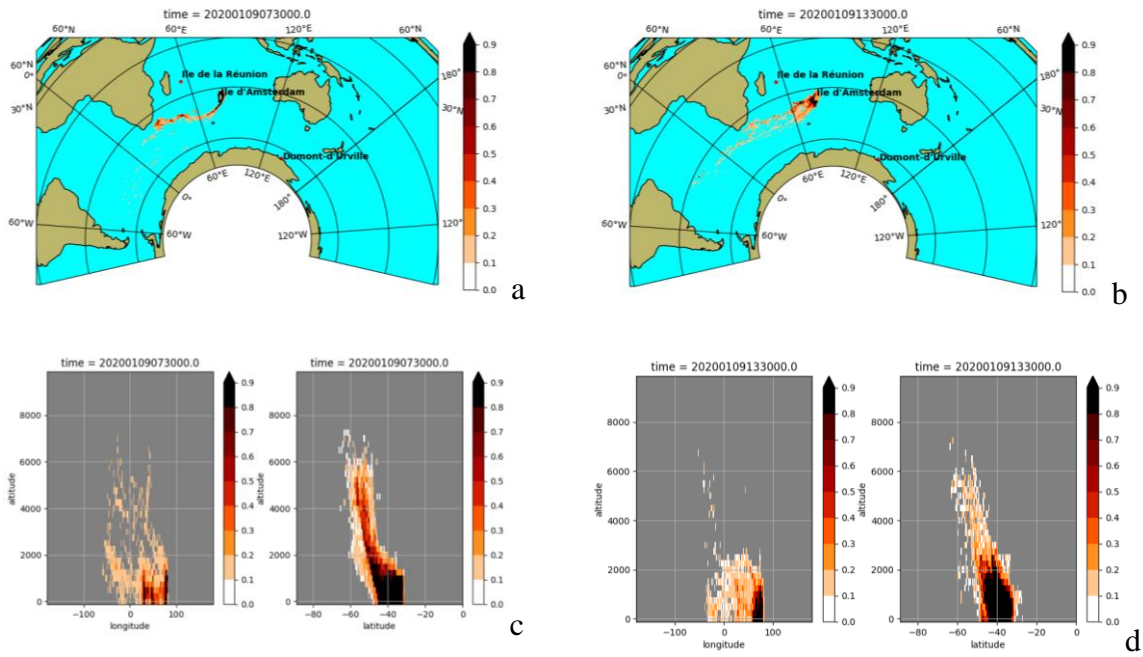

100  
 101 **Figure S3:** FLEXPART footprints in 2D projections for the event of the 9<sup>th</sup> of January. The  
 102 colors on each grid point of these projections represent the density of particles over the ten-  
 103 day back trajectories (1000 particules per launch). A dark red color indicates a zone with a  
 104 high concentration of particles, hence a region from which a large part of the air mass  
 105 originates. a: latitude-longitude projection of the FLEXPART back trajectory footprint for the  
 106 9<sup>th</sup> of January 2020 at 7h30. b: same as a for the 9<sup>th</sup> of January 2020 at 13h30. c: left is the  
 107 longitude-altitude projection of the FLEXPART back trajectory footprint for the 9<sup>th</sup> of  
 108 January 2020 at 7h30; right is the latitude-altitude projection of the FLEXPART back  
 109 trajectory footprint for the 9<sup>th</sup> of January 2020 at 13h30. d: same as a for the 9<sup>th</sup> of January  
 110 2020 at 13h30.

111

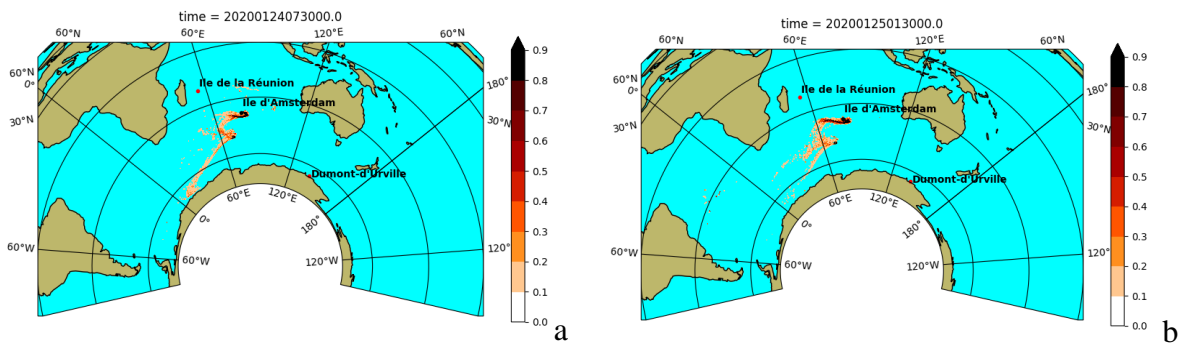

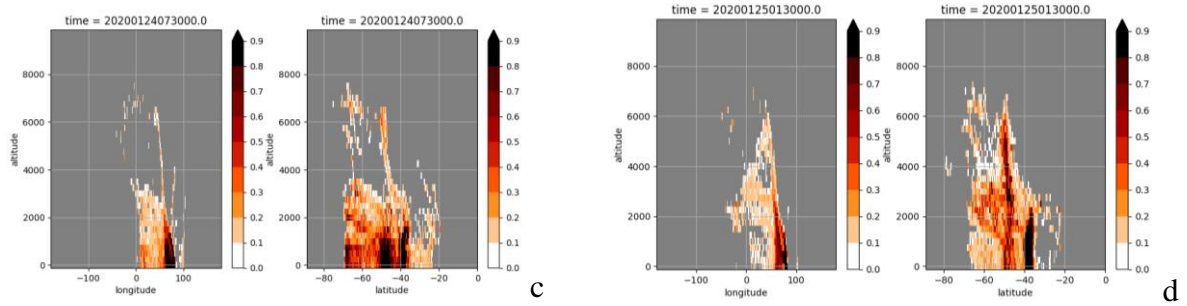

112  
 113 **Figure S4:** FLEXPART footprints in 2D projections for the event of the 21<sup>st</sup> of January. The  
 114 colors on each grid point of these projections represent the density of particles over the ten-  
 115 day back trajectories (1000 particules per launch). A dark red color indicates a zone with a  
 116 high concentration of particles, hence a region from which a large part of the air mass  
 117 originates. a: latitude-longitude projection of the FLEXPART back trajectory footprint for the  
 118 21<sup>st</sup> of January 2020 at 7h30. b: same as a for the 21<sup>st</sup> of January 2020 at 13h00. c: left is the  
 119 longitude-altitude projection of the FLEXPART back trajectory footprint for the 21<sup>st</sup> of  
 120 January 2020 at 7h30; right is the latitude-altitude projection of the FLEXPART *back*  
 121 trajectory footprint for the 21<sup>st</sup> of January 2020 at 13h30. d: same as a for the 21<sup>st</sup> of January  
 122 2020 at 13h00.

123

124

125 2. Model outputs for the 4 events over the period January – March 2020

126

127

128



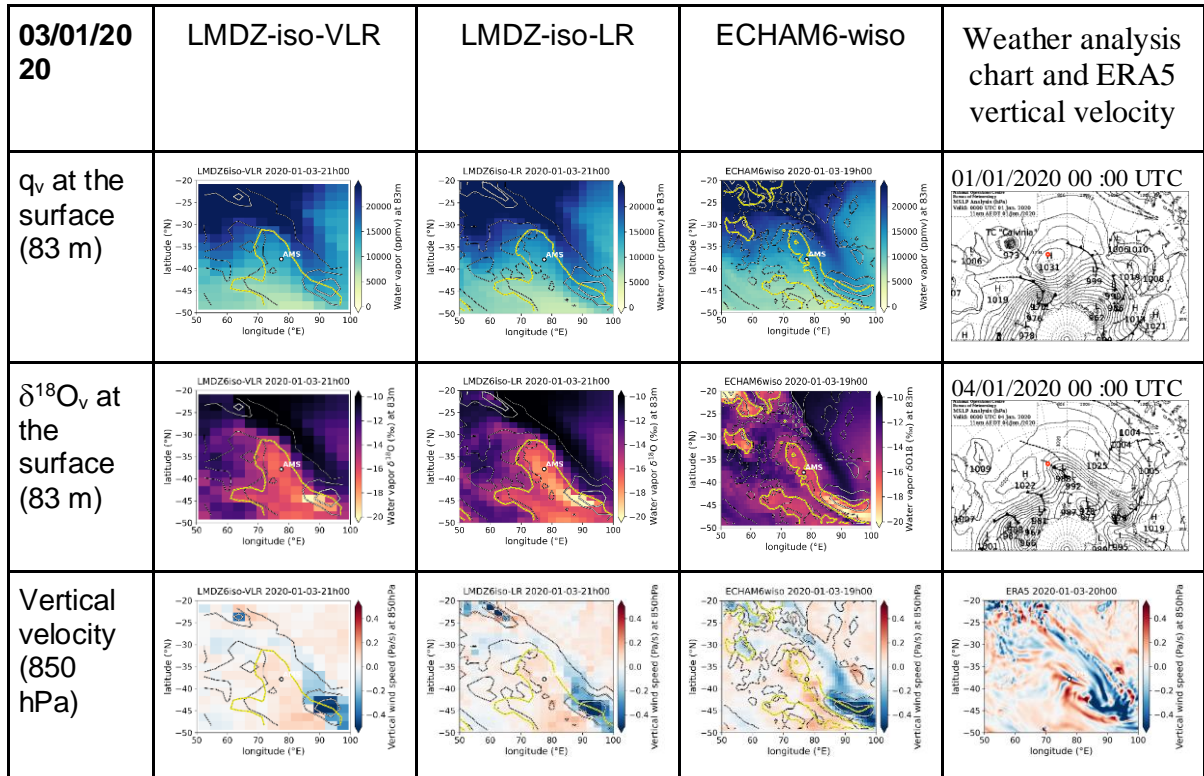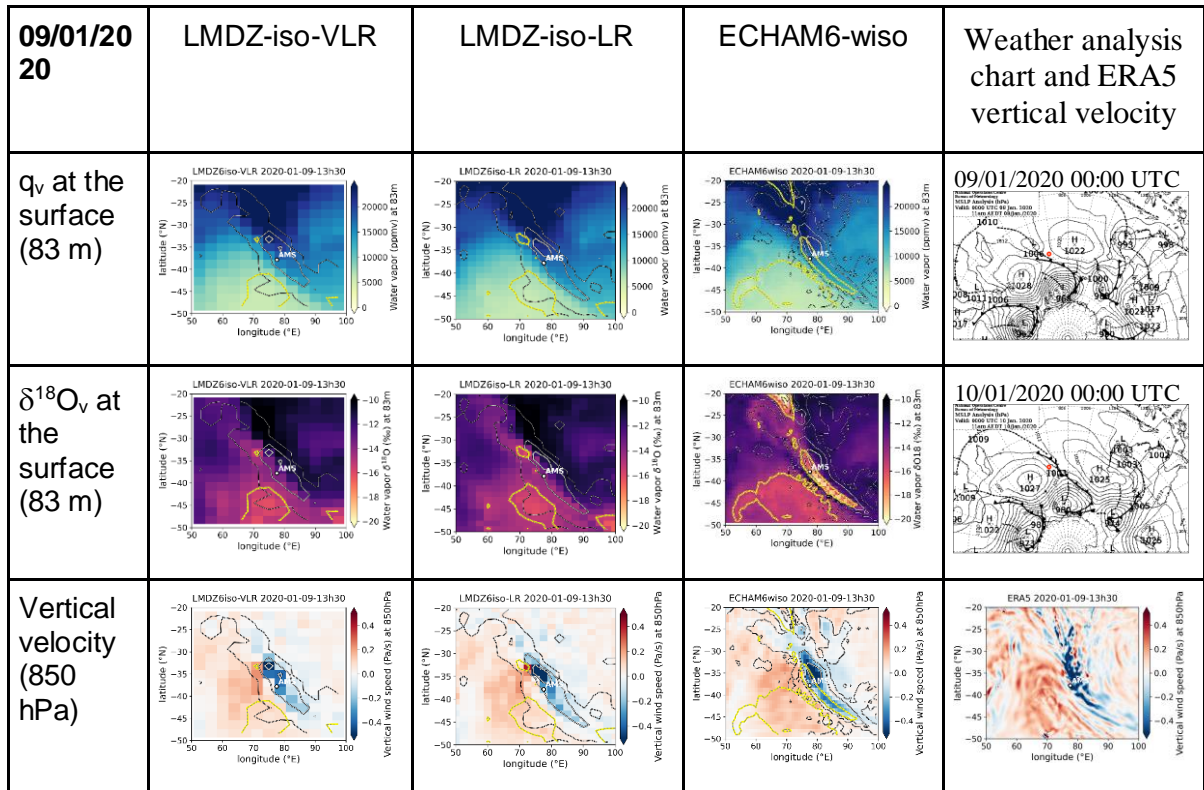

136

137

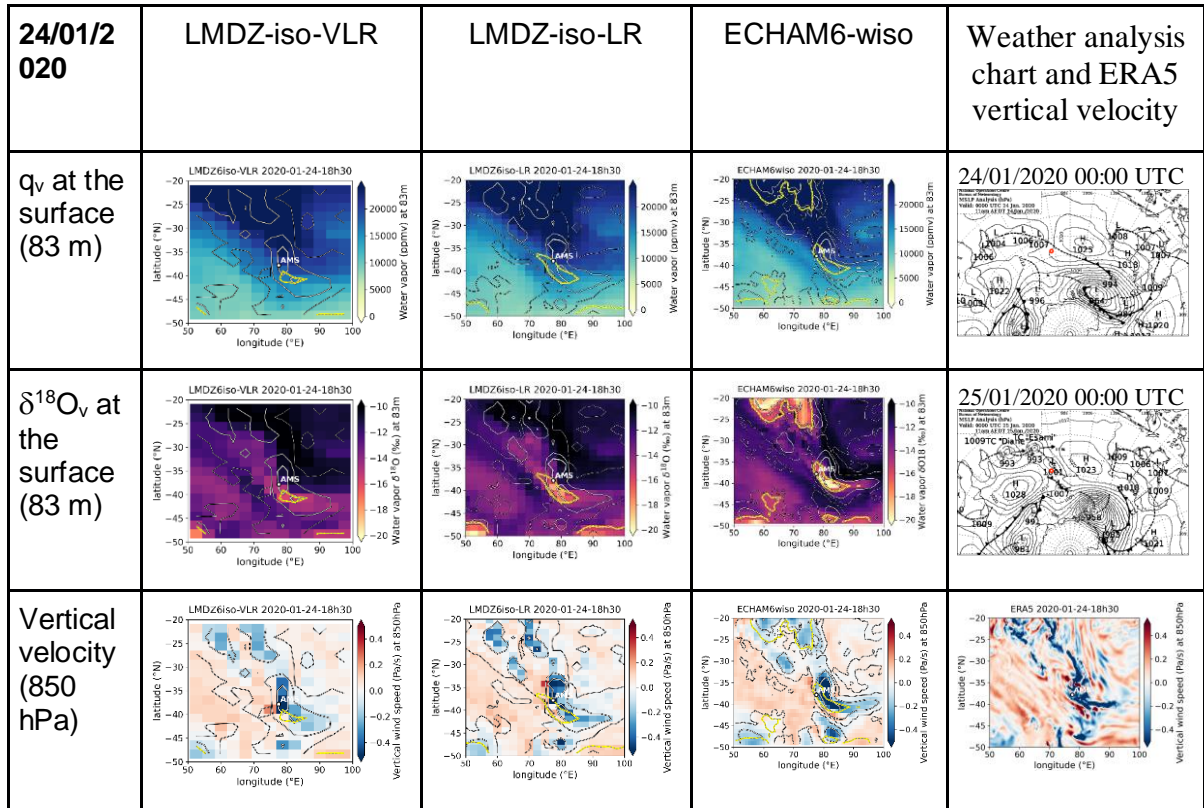

138

139

140

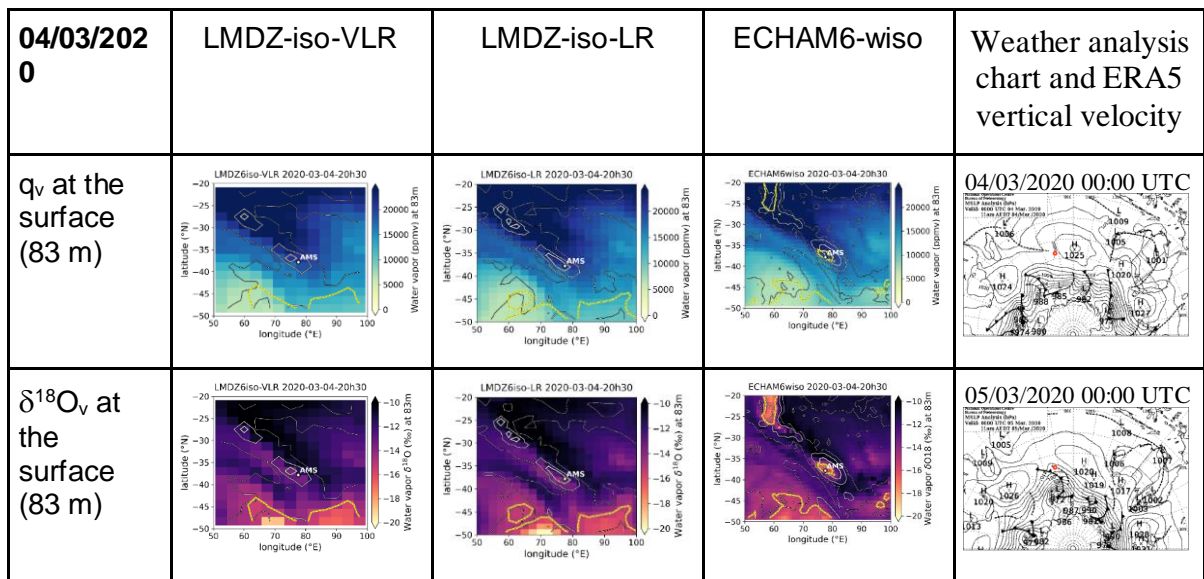

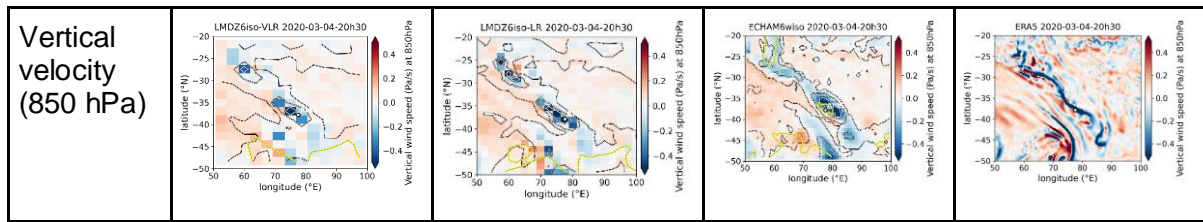

141

142 **Figure S5:** Modeled water mixing ratio and  $d^{18}O_v$  at the surface and vertical velocity at 850 hPa for  
 143 the 4 events of the beginning of 2020 as modeled by LMDZ6 with very low resolution (1st column),  
 144 low resolution (2nd column), ECHAM6-wiso (3rd column) and ERA5 (4th column). Yellow contours  
 145 indicate  $-15\text{‰}$  contour of surface water vapor  $\delta^{18}O$ . Black contours: precipitation contours at 0.5, 10,  
 146 and 50 mm day $^{-1}$  (thin, medium and thick lines respectively). Weather analysis chart are provided  
 147 once a day at 00:00 UTC by the Analysis Chart Archive service of the Australian Government Bureau  
 148 of Meteorology (<http://www.bom.gov.au/australia/charts/archive/index.shtml>). Red dot on weather  
 149 charts displays Amsterdam Island location.

150

151

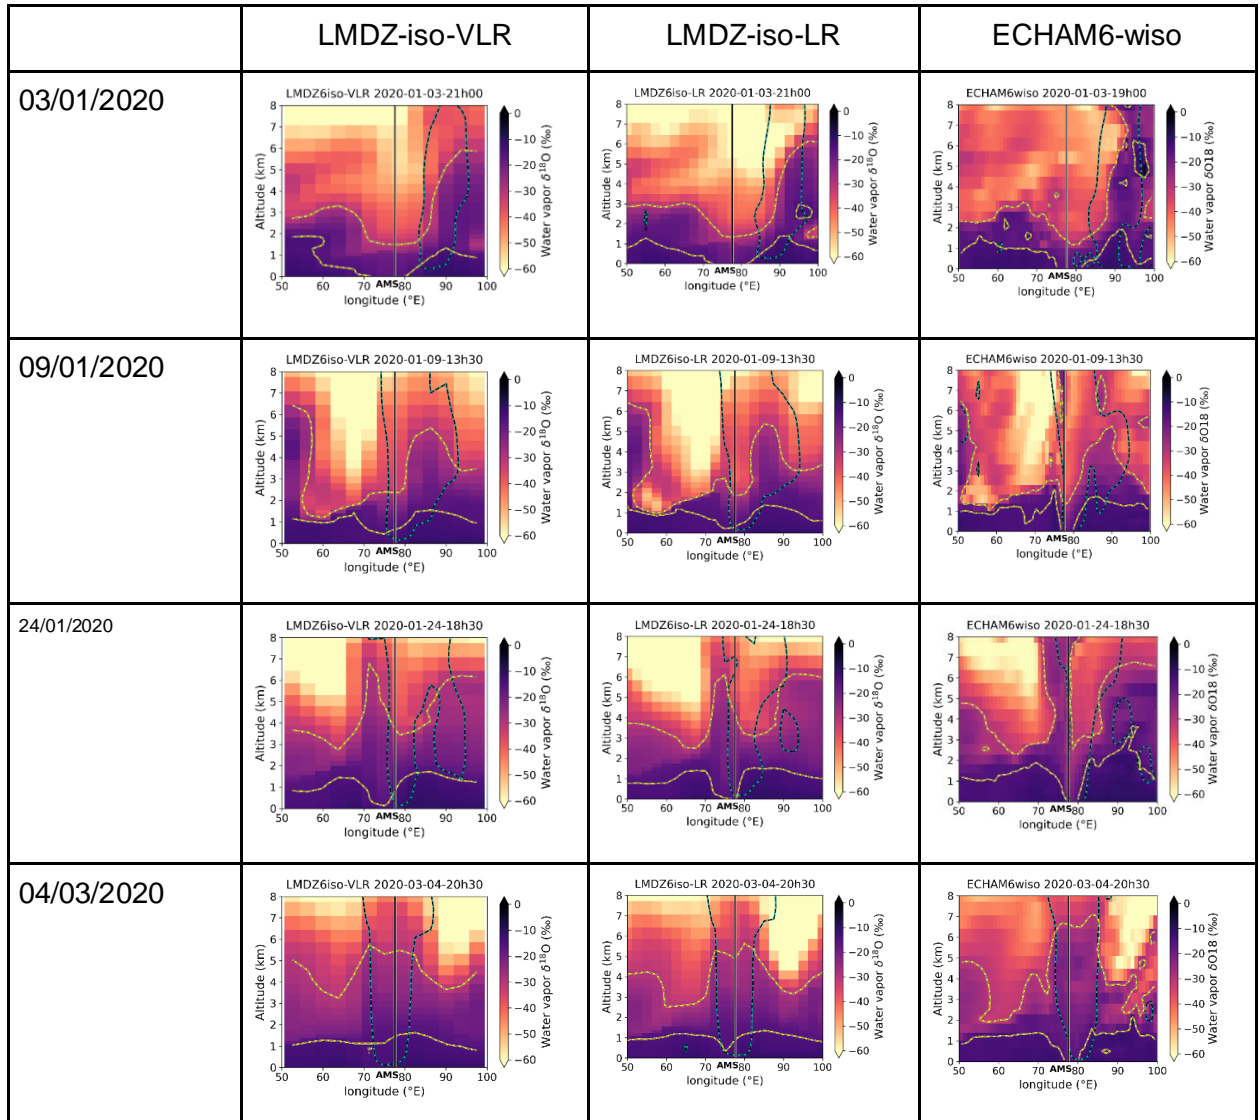

153

154

155 **Figure S6** :  $\delta^{18}\text{O}$  of water vapor plotted on a cross section of longitude (x) versus altitude (y) at the  
 156 Amsterdam latitude as modeled by LMDZ6 with very low resolution (left), low resolution (middle)  
 157 and ECHAM6-wiso (right). Yellow contours indicate  $-30\text{‰}$  (upper) and  $-15\text{‰}$  (lower) contours of  
 158 surface air water vapor  $\delta^{18}\text{O}$ . Black contours indicate contours of  $-0.05 \text{ Pa s}^{-1}$  vertical velocity  
 159 (ascendence). The vertical black line denotes Amsterdam Island latitude.

160

161



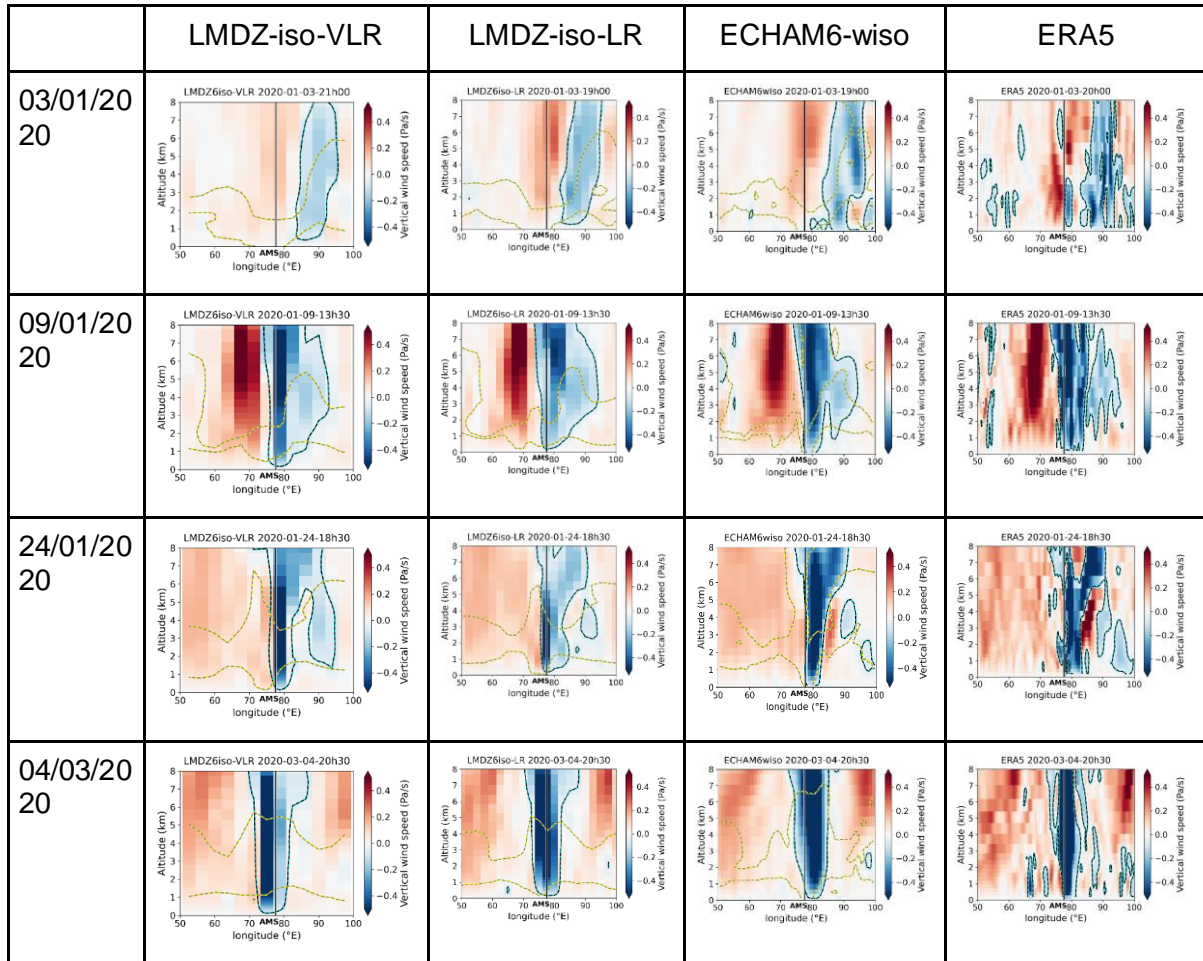

163

164

165 **Figure S7:** Vertical velocity plotted on a cross section of longitude (x) versus altitude (y) at the  
 166 Amsterdam latitude as modeled by LMDZ6 with very low resolution (1st column), low resolution  
 167 (2nd column), ECHAM6-wiso (3rd column) and ERA5 (4th column). Yellow contours indicate  $-30\%$   
 168 (upper) and  $-15\%$  (lower) contours of surface air water vapor  $\delta^{18}\text{O}$ . Black contours indicate contours  
 169 of  $-0.05 \text{ Pa s}^{-1}$  vertical velocity (ascendence). The vertical black line denotes Amsterdam Island  
 170 latitude.

171

172



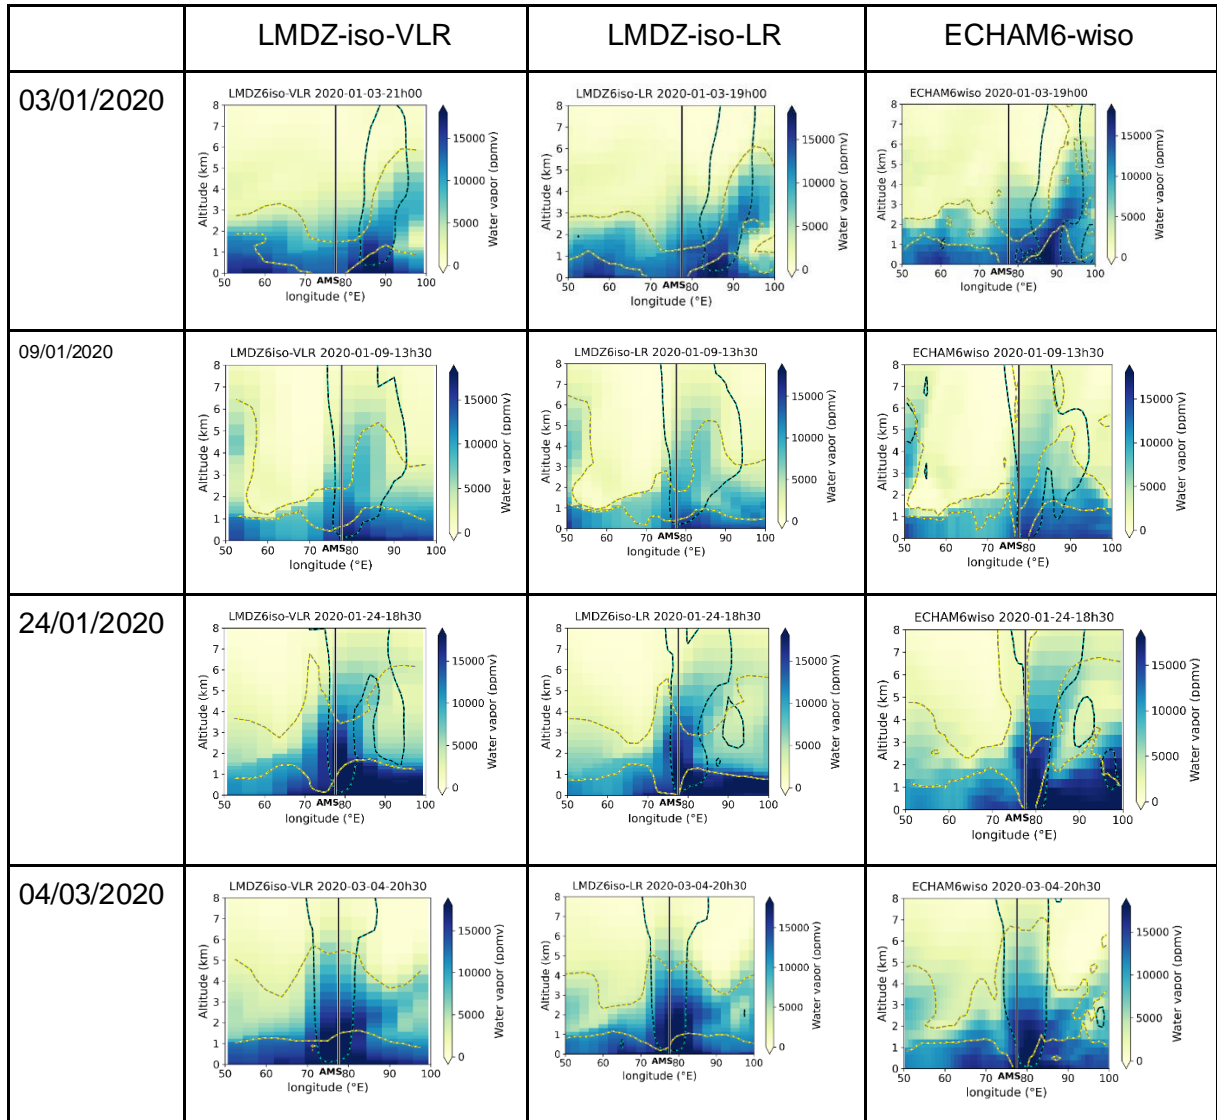

174

175

176

**Figure S8:** Humidity plotted on a cross section of longitude (x) versus altitude (y) at the Amsterdam

177

latitude as modeled by LMDZ6 with very low resolution (left), low resolution (middle) and

178

ECHAM6-wiso (right). Yellow contours indicate  $-30\%$  (upper) and  $-15\%$  (lower) contours of surface

179

air water vapor  $\delta^{18}\text{O}$ . Black contours indicate contours of  $-0.05 \text{ Pa s}^{-1}$  vertical velocity (ascendence).

180

The vertical black line denotes Amsterdam Island latitude.

181

182

183

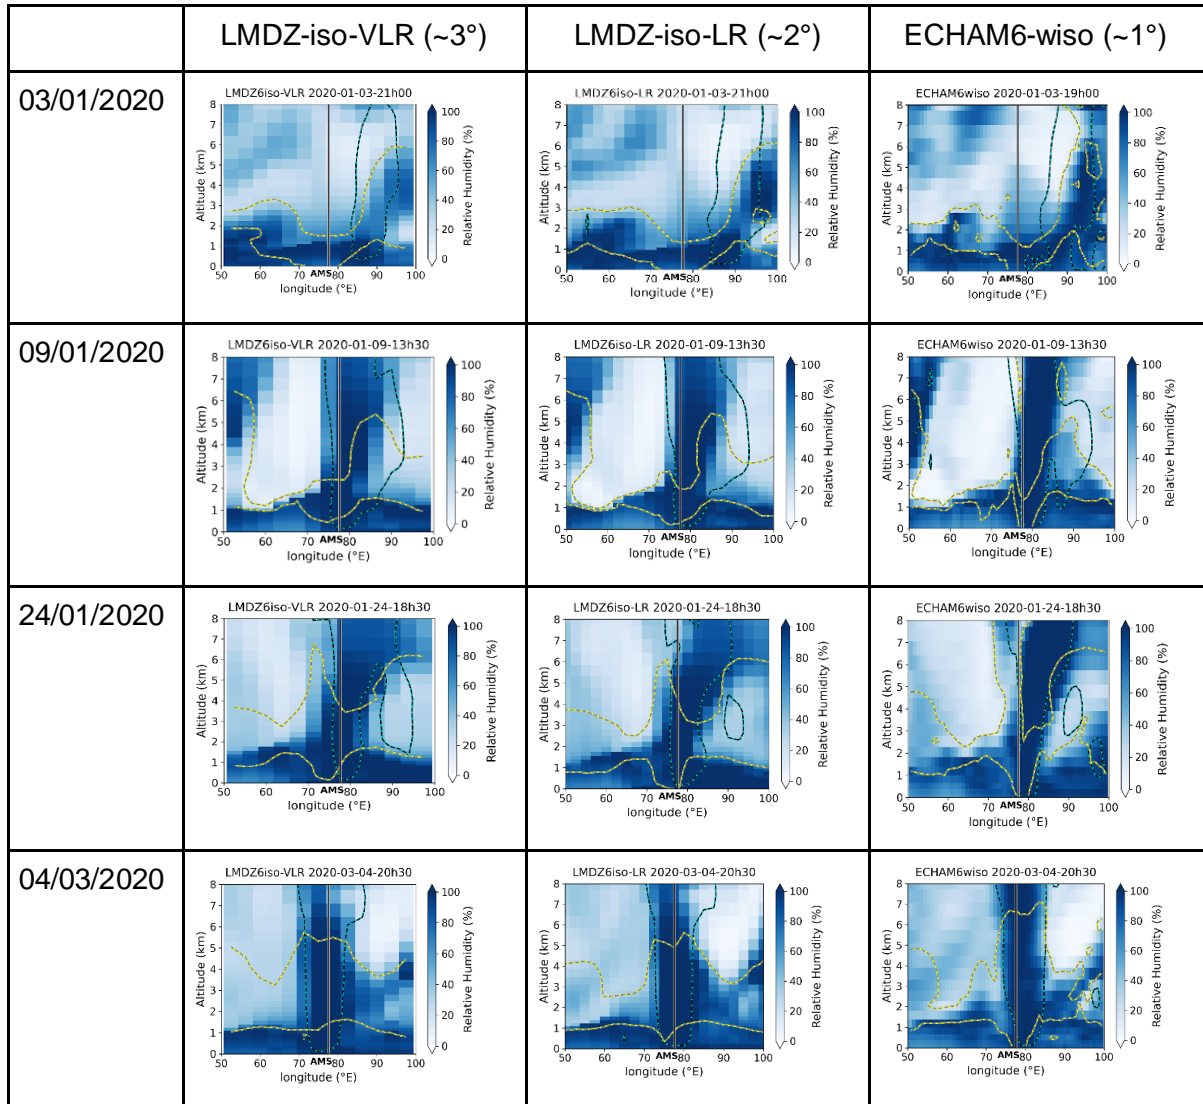

185

186

187

188

189

190

191

192

193

194

**Figure S9:** Relative humidity plotted on a cross section of longitude (x) versus altitude (y) at the Amsterdam latitude as modeled by LMDZ6 with very low resolution (left), low resolution (middle) and ECHAM6-wiso (right). Yellow contours indicate  $-30\text{‰}$  (upper) and  $-15\text{‰}$  (lower) contours of surface air water vapor  $\delta^{18}\text{O}$ . Black contours indicate contours of  $-0.05 \text{ Pa s}^{-1}$  vertical velocity (ascendence). The vertical black line denotes Amsterdam Island latitude.

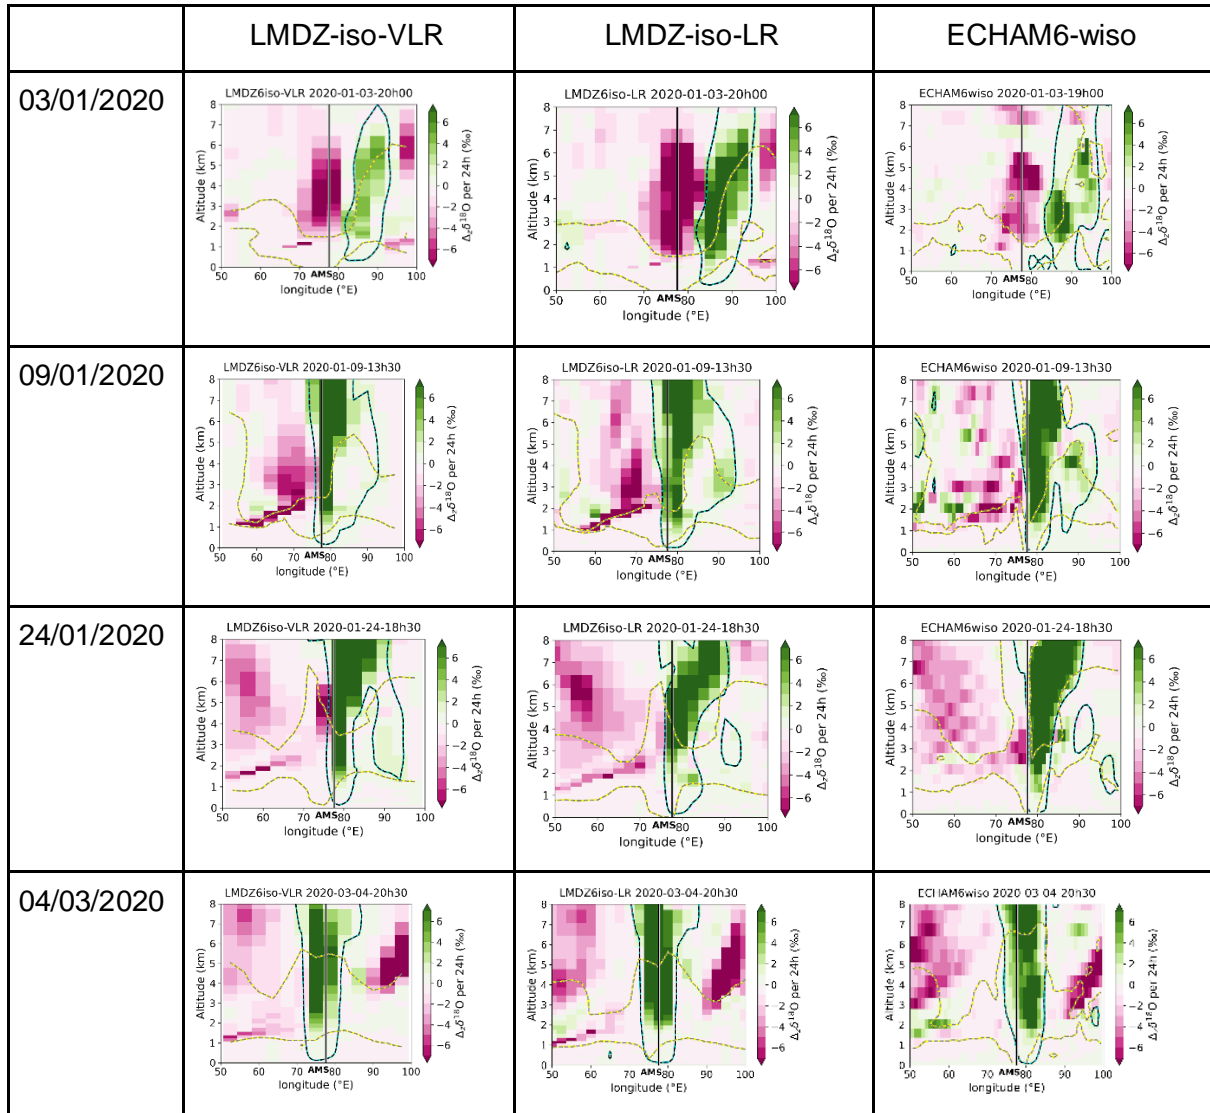

196

197

198

199

200

201

202

203

204

205

206

207

208

209

210

211

212

213

214

215

216

217

218

219

220

**Figure S10:** Vertical advection of delta per 24h (calculated as  $dq_{adv,z} / q_{surf} \times (\delta^{18}O - \delta^{18}O_{surf})$ , positive for increase of delta at the surface and negative for decrease of delta at surface) on a cross section of longitude (x) versus altitude (y) at the Amsterdam latitude as modeled by LMDZ6 with very low resolution (left), low resolution (middle) and ECHAM6-wiso (right). Yellow contours indicate  $-30\text{‰}$  (upper) and  $-15\text{‰}$  (lower) contours of surface air water vapor  $\delta^{18}O$ . Black contours indicate contours of  $-0.05 \text{ Pa s}^{-1}$  vertical velocity (ascendence). The vertical black line denotes Amsterdam Island latitude.

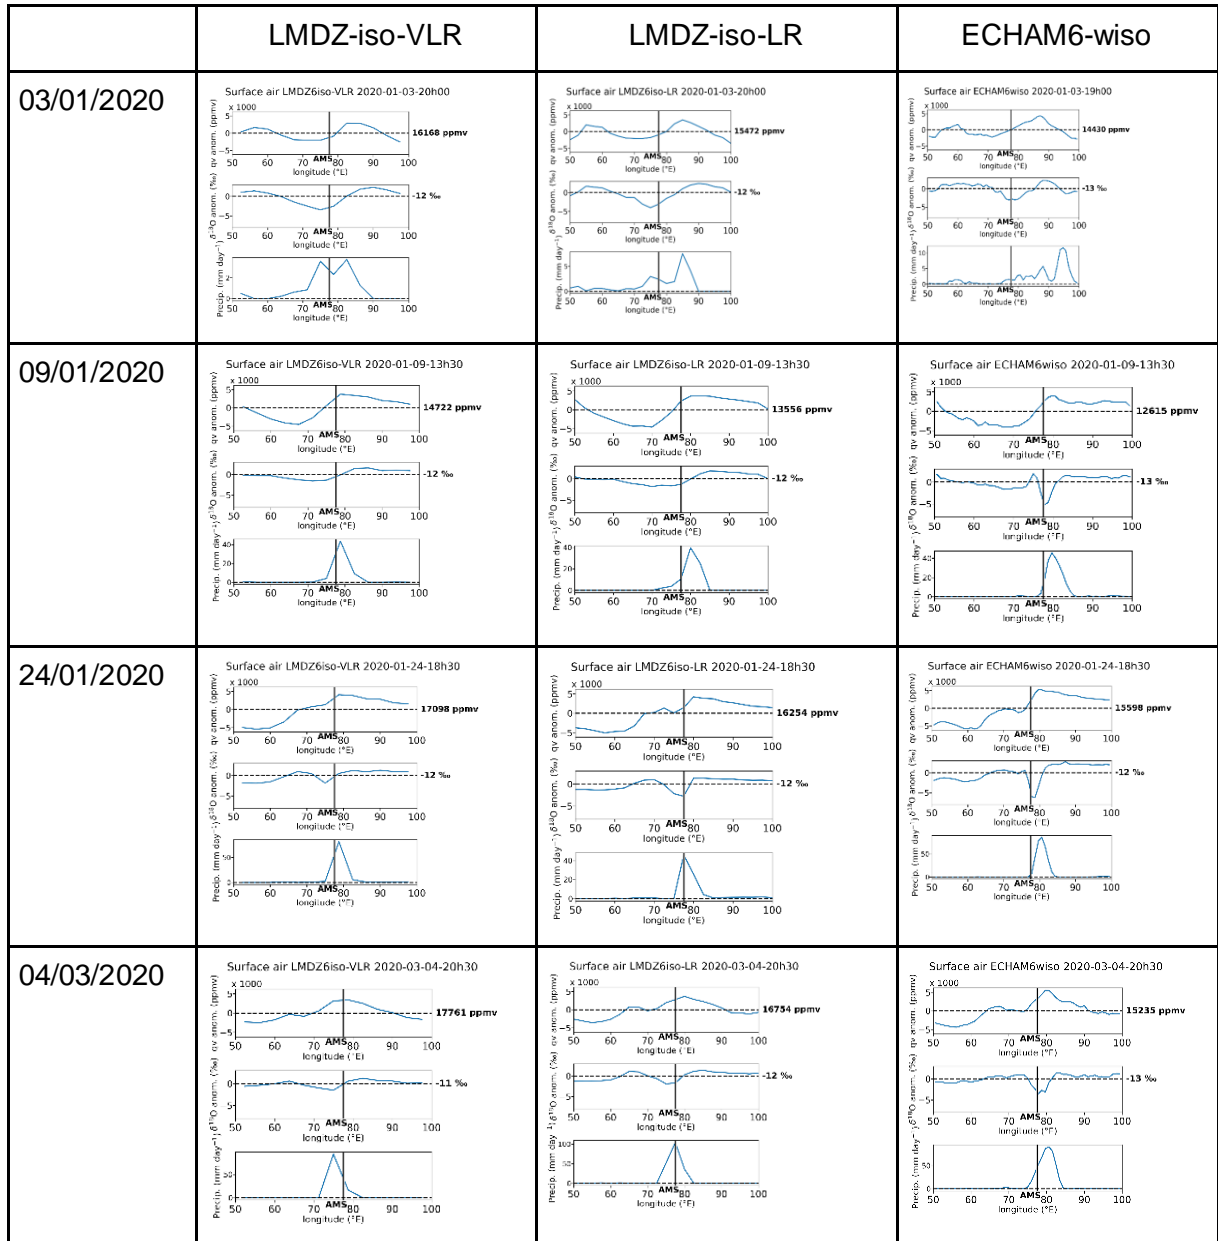

207

208

209 **Figure S11** : Surface signal ( $q_v$  on the top,  $\delta^{18}O_v$  on the middle and precipitation on the bottom) as  
 210 modeled by LMDZ6 with very low resolution (left), low resolution (middle) and ECHAM6-  
 211 wiso (right).

212

213

214

215

216

217
